# Supplementary material
Source: ML conference proceedings conference paper supplement (https://openaccess.thecvf.com/content/CVPR2021/html/Yang_S3_Neural_Shape_CVPR_2021_paper.html)
Supplement: Supplementary file 3 [file Yang_S3_Neural_Shape_CVPR_2021_supplemental.zip]

Archive with 4 entries (4 files):
- 05498-video.mp4
- __MACOSX/._05498-video.mp4
- 05498-supp.pdf
- __MACOSX/._05498-supp.pdf
